# Supplementary material
Source: Springer Nature journal article supplement (http://www.nature.com/nature/journal/v401/n6752/extref/401470a0.intracellular_recordings.pdf)
Supplement: 401470a0.intracellular_recordings.pdf [file 401470a0.intracellular_recordings.pdf]

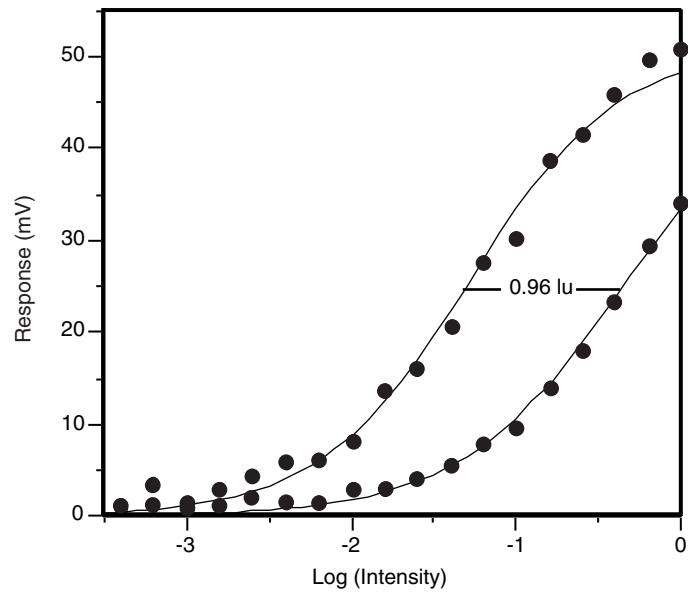

**Figure** Intracellular recordings in the retina of a postero-median eye of the spider *Drassodes cupreus*. Left and right response-intensity curves are recorded with light polarized parallel and perpendicular to the long axis of the eye, respectively. The intensity shift of 0.96 log units between the two curves translates to a polarization sensitivity of 9.1.
